# Supplementary material for: KPC-3-, GES-5-, and VIM-1-Producing Enterobacterales Isolated from Urban Ponds
Source: MDPI journal article supplement (doi:10.3390/ijerph19105848), 2022-05-11
Supplement: s1 [file s1]

# **KPC-3, GES-5 and VIM-1-producing *Enterobacterales* isolated from urban ponds**

Pedro Teixeira<sup>1,2#</sup>, Nuno Pinto<sup>2#</sup>, Isabel Henriques<sup>3\*</sup>, Marta Tação<sup>1,2</sup>

<sup>1</sup>CESAM (Centre for Marine and Environmental Studies), University of Aveiro, Aveiro, Portugal

<sup>2</sup>Biology Department, University of Aveiro, Aveiro, Portugal

<sup>3</sup>University of Coimbra, Centre for Functional Ecology, Department of Life Sciences, Coimbra, Portugal

\*Corresponding author: [isabel.henriques@uc.pt](mailto:isabel.henriques@uc.pt)

#Authors contributed equally

## **SUPPLEMENTARY MATERIAL**

Tables S1-S3

Figures S1-S5

**Table S1.** PCR primers used in molecular typing, 16S rRNA based affiliation and screening of ARGs and Integrons

| Gene                             | Sequences                                                         | Fragment size(bp) |
|----------------------------------|-------------------------------------------------------------------|-------------------|
| <i>blaKPC</i> <sup>[76]</sup>    | FW 5' - CATTCAAGGGCTTTCTTGCTGC<br>REV 5' - ACGACGGCATAGTCATTTGC   | 538               |
| <i>blaNDM</i> <sup>[76]</sup>    | FW 5' - GGTTCGGCGATCTGGTTTC<br>REV 5' - CGGAATGGCTCATCACGATC      | 621               |
| <i>blaVIM</i> <sup>[76]</sup>    | FW 5' - GATGGTGTTCGGTCGCATATCG<br>REV 5' - GCCACGTTCCCCGCAGACG    | 475               |
| <i>blaGES</i> <sup>[76]</sup>    | FW 5' - AGTCGGCTAGACCGGAAAG<br>REV 5' - TTTGTCCGTGCTCAGGAT        | 399               |
| <i>blaOXA-48</i> <sup>[76]</sup> | FW 5' - TTGGTGGCATCGATTATCGG<br>REV 5' - GAGCACTTCTTTGTGATGGC     | 744               |
| <i>blaCTX-M</i> <sup>[76]</sup>  | FW 5' - GTGCAGTACCAGTAAAGTTATGG<br>REV 5' - CGCAATATCATTGGTGGTGCC | 538               |
| <i>mcr-1</i> <sup>[117]</sup>    | FW 5' - CGGTCAGTCCGTTTGTTTC<br>REV 5' - CTTGGTCGGTCTGTAGGG        | 350               |
| 16S rRNA <sup>[118]</sup>        | FW 5' - AGAGTTTGATCCTGGCTCAG<br>REV 5' - GGTTACCTTGTTACGACTTT     | 1467              |
| <i>Int1</i> <sup>[119]</sup>     | FW 5' - ACATGCGTGTAATCGTC<br>REV 5' - CTGGATTTTCGATGACGGCACG      | 280               |
| <i>Int2</i> <sup>[119]</sup>     | FW 5' - ACGGCTACCCTCTGTTAT<br>REV 5' - TTATTGCTGGGATTAGGC         | 233               |
| <i>Int3</i> <sup>[119]</sup>     | FW 5' - AGTGGGTGGCGAATGAGTG<br>REV 5' - TGTTCTTGATCGGCAGGTG       | 600               |
| BOX element <sup>[120]</sup>     | BOXA1R: CTACGGCAAGGCGACGCTGAC                                     | variable          |

**Table S2.** Percentage of imipenem resistant CFUs in the sampled ponds and estuarine canal in February and March 2019, and from September 2019 to February 2020. No imipenem-resistant colonies were obtained from Pond P4 and P5. Hyphens are exhibited whenever no imipenem resistant CFUs were detected.

| Sampling sites | feb/19 | mar/19 | sept/19 | oct/19 | nov/19 | dec/19 | jan/20 | feb/20 |
|----------------|--------|--------|---------|--------|--------|--------|--------|--------|
| P1             | 0.0244 | 0.0018 | 0.1609  | 0.0058 | 0.0535 | 0.0045 | 0.0019 | 0.0018 |
| P2             | 0.0003 | 0.0010 | -       | -      | -      | -      | -      | -      |
| P3             | -      | -      | -       | -      | 0.0005 | -      | -      | -      |
| E1             | -      | -      | -       | 0.0045 | 0.0624 | 0.0032 | 0.0047 | 0.0025 |

**Table S3.** General features of *C. freundii* F6, *R. ornithinolytica* N9 and *E. kobei* N10 draft genomes and WGS-based parameters used for phylogenetic affiliation.

|                     | <i>C. freundii</i> F6 | <i>R. ornithinolytica</i> N9 | <i>E. kobei</i> N10 |
|---------------------|-----------------------|------------------------------|---------------------|
| Size (bp)           | 5,117,230             | 6,252,962                    | 5,397,864           |
| GC content (%)      | 51.7                  | 55.2                         | 54.4                |
| Nº Contigs          | 230                   | 420                          | 431                 |
| Coverage            | 180x                  | 170x                         | 115x                |
| N50                 | 88,228                | 109,201                      | 65,421              |
| Nº of CDS           | 4997                  | 6014                         | 5128                |
| Nº of tRNAs         | 80                    | 84                           | 80                  |
| Nº of rRNAs         | 2                     | 2                            | 1                   |
| Sequence Type       | ST270                 | -                            | ST1378              |
| ANIb (%)*           | 98.32                 | 99.16                        | 99.25               |
| ANIm (%)*           | 98.98                 | 99.53                        | 99.85               |
| dDDH(%)*            | 90.50                 | 94.90                        | 94.30               |
| Difference in %G+C* | 0.01                  | 0.47                         | 0.01                |

\*For species identification, *C. freundii* ATCC 8090 (JMTA01000050), *R. ornithinolytica* NBRC 105727 (BCYR0100000000) and *E. kobei* DSM13645 (CP017181) were used as reference genomes.

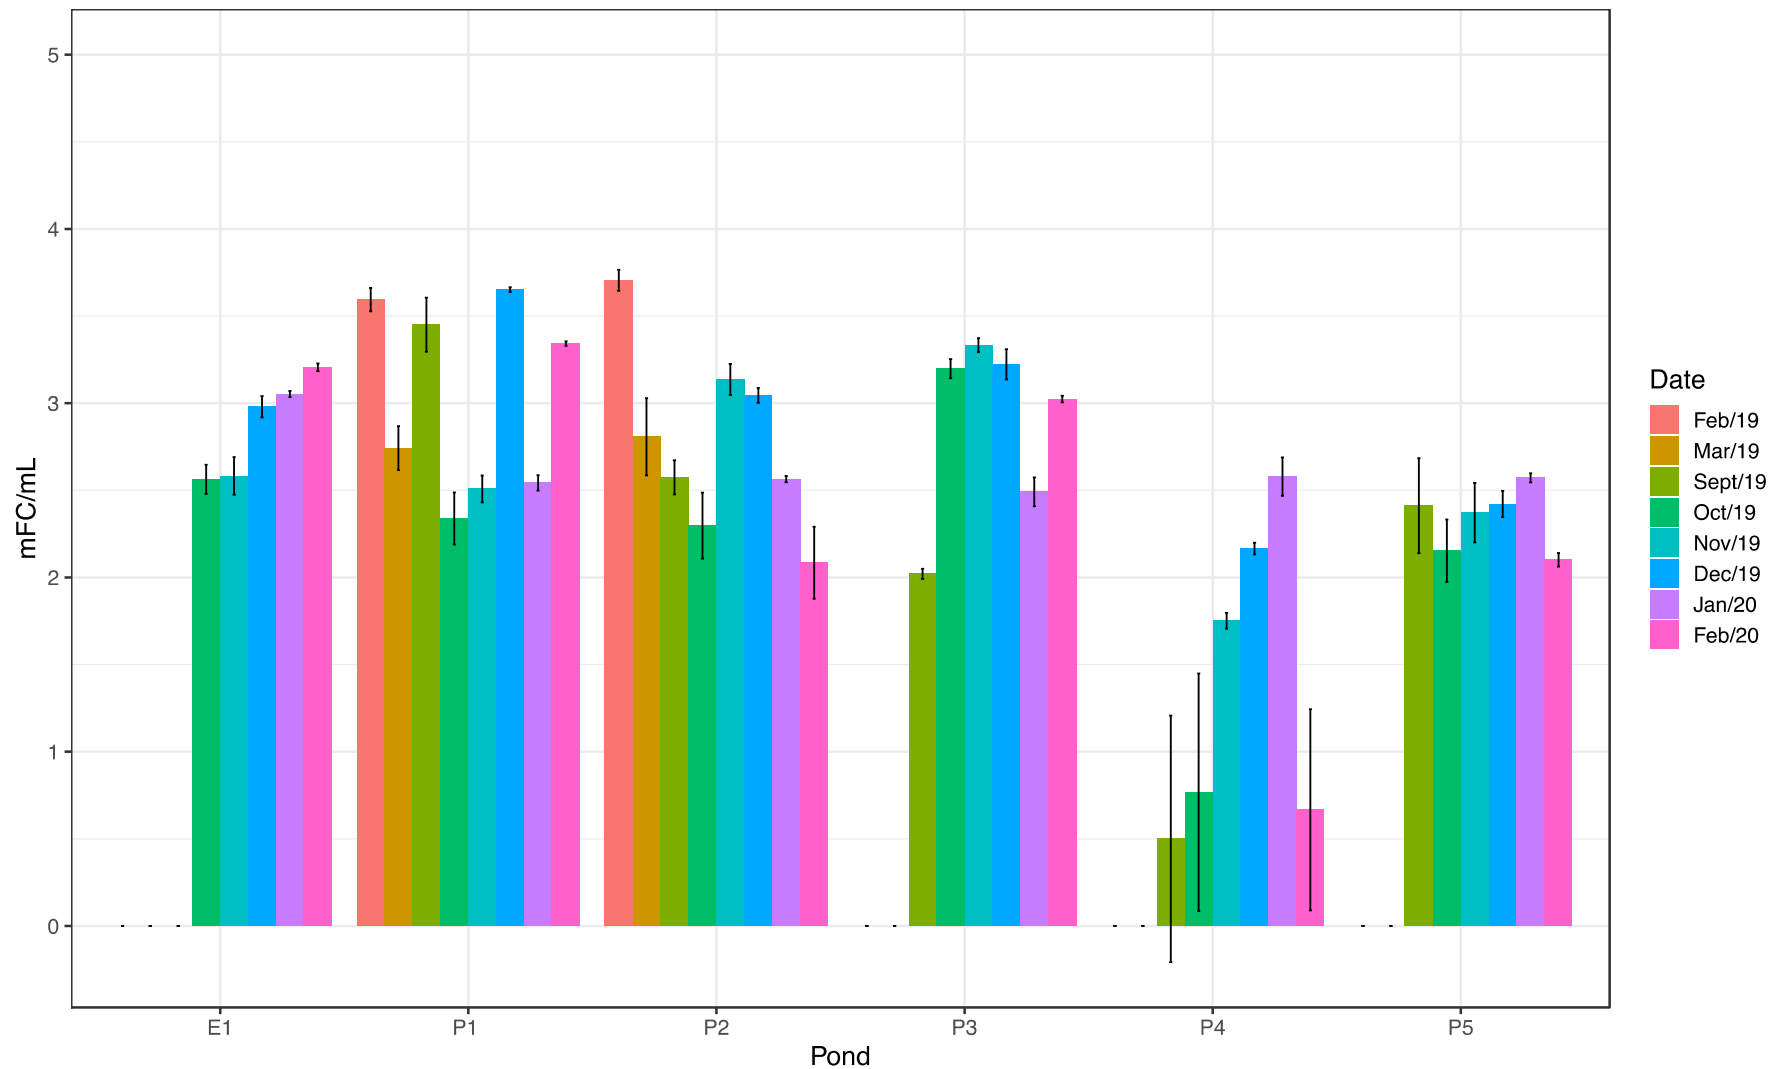

**Figure S1.** Average counting of typical coliforms in CFU/mL (log<sub>10</sub>) collected in February and March 2019, and from September 2019 to February 2020, from five ponds and an estuarine canal. In both February and March 2019, samples were only collected from ponds P1 and P2, while in September 2019, no samples were collected from E1.

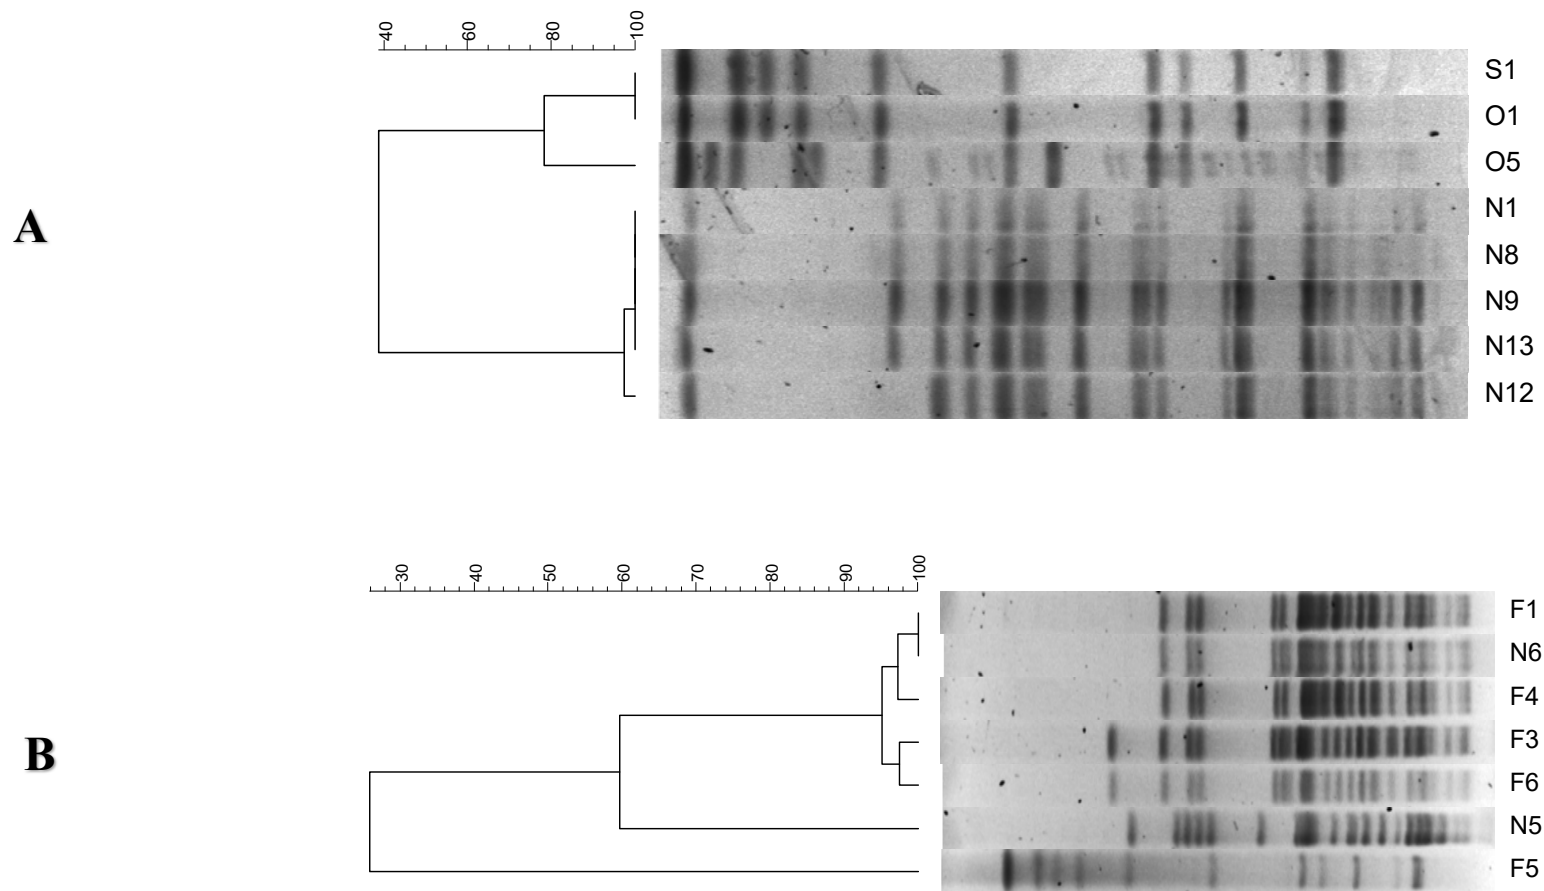

**Figure S2.** Dendrogram with the PFGE restriction patterns of genomic DNA from the 8 *Raoultella* (A) and the 7 *Citrobacter* (B) selected strains digested with XbaI. The dendrogram was constructed using GelCompar II version 6.1 (Applied Maths, Belgium) with Dice coefficient and UPGMA clustering (Opt. 2.00%; Tol 1.0%; H > 0.0%; S > 0.0%).

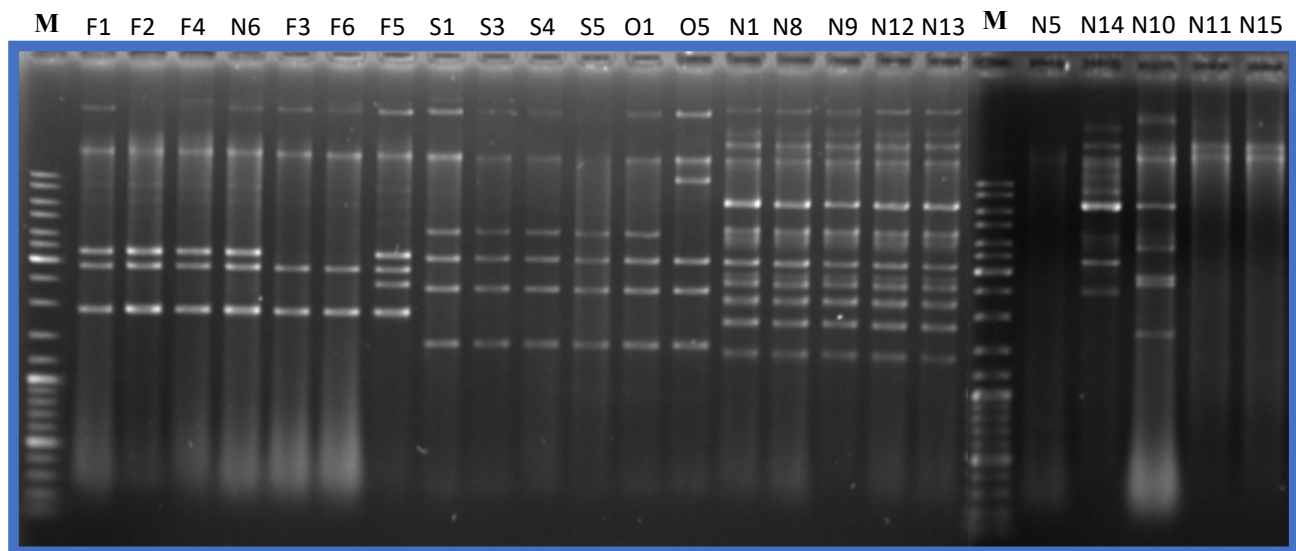

**Figure S3.** Plasmid DNA fingerprint of the entire CRE collection comprising 23 isolates. The molecular weight marker 1.5 Kb DNA NZYDNA Ladder VI (NzyTech, Portugal) is represented by the letter M.

A

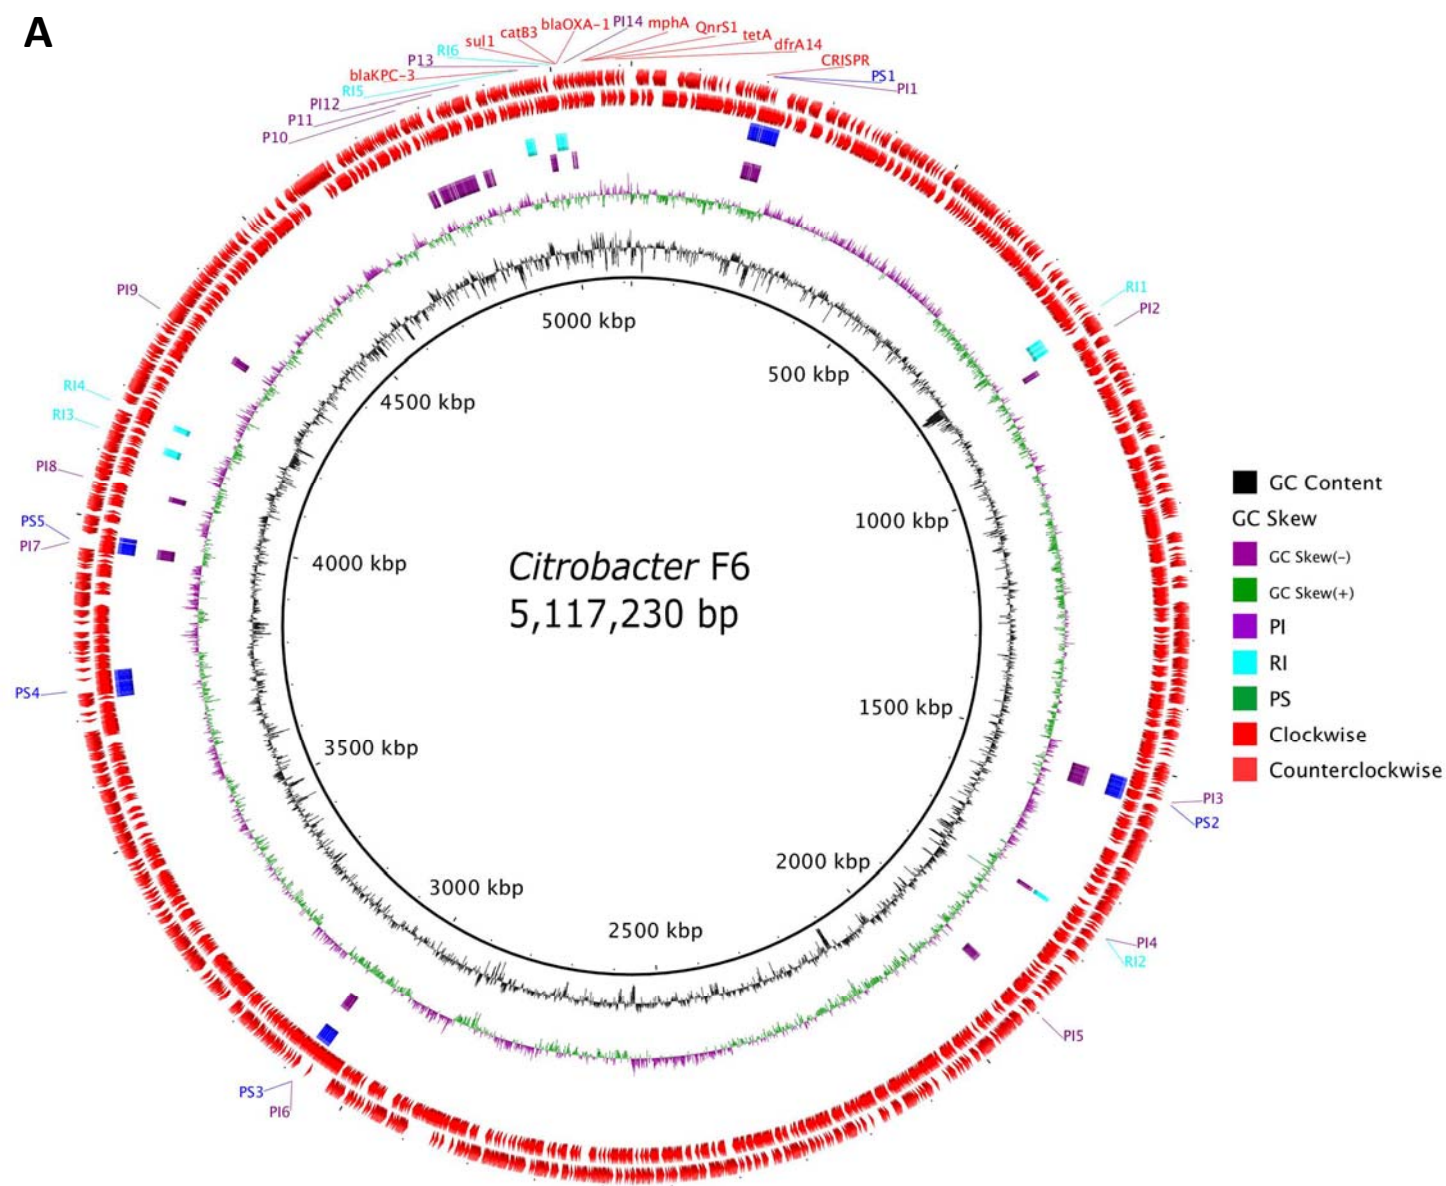

**B**

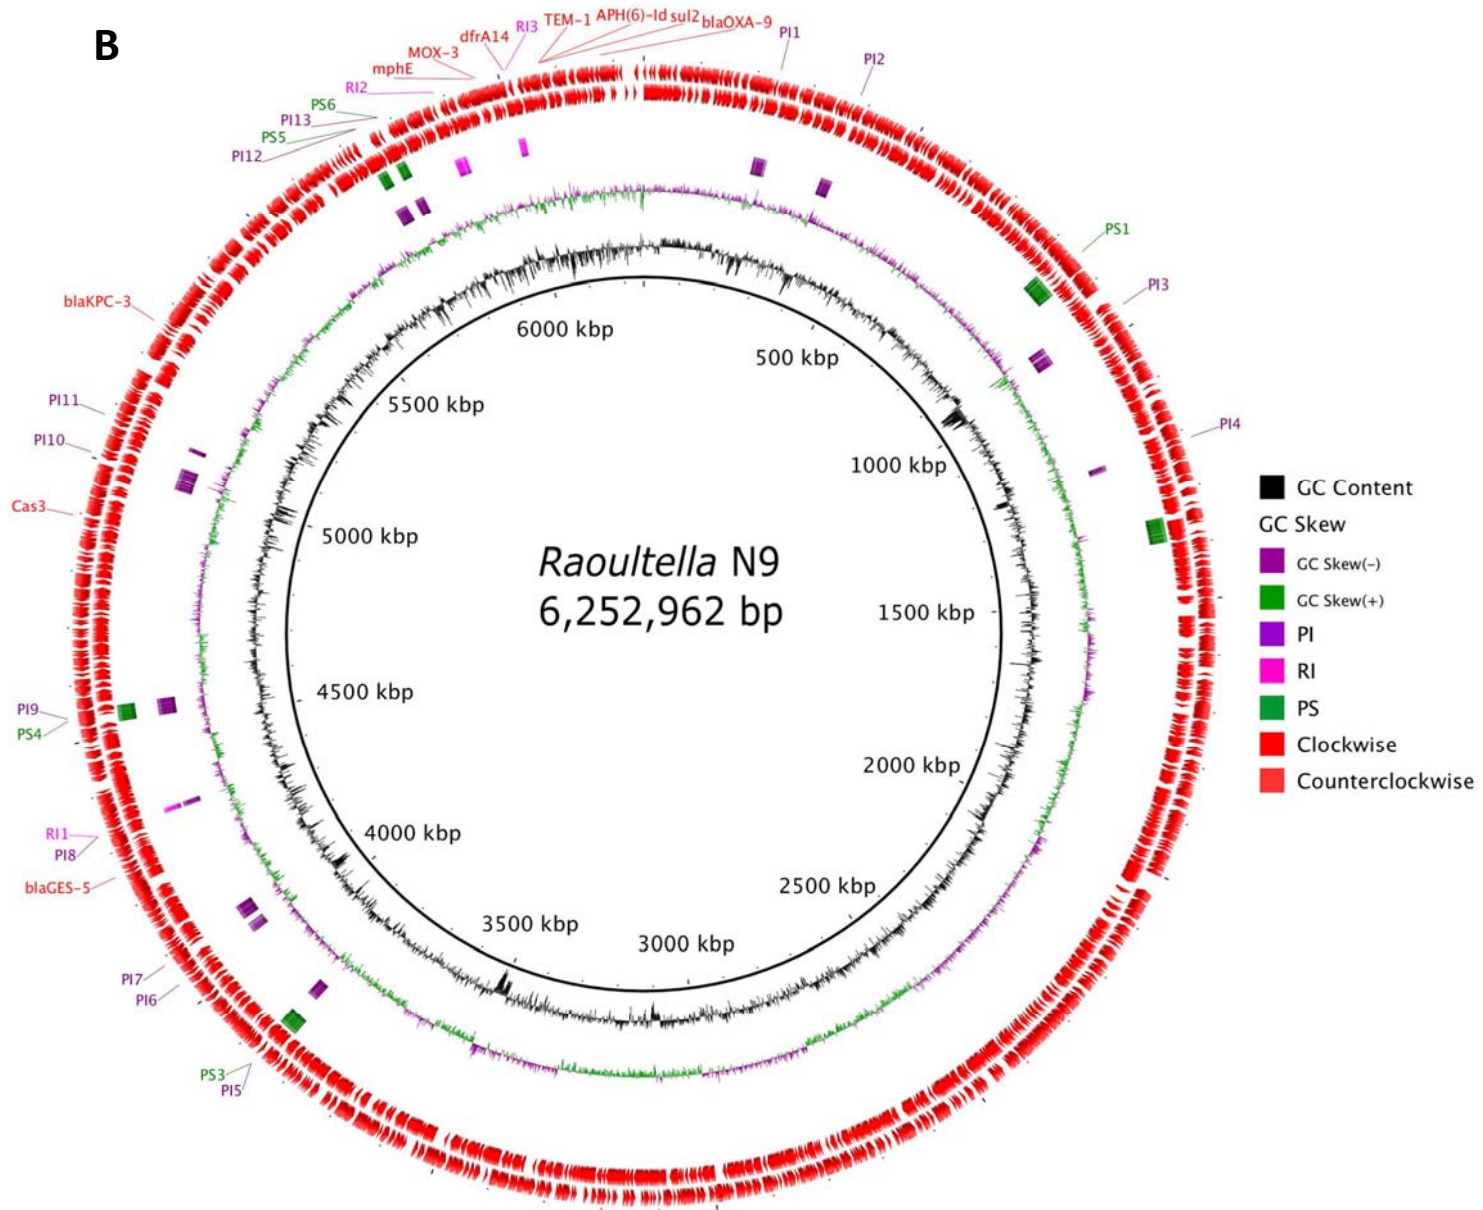



C

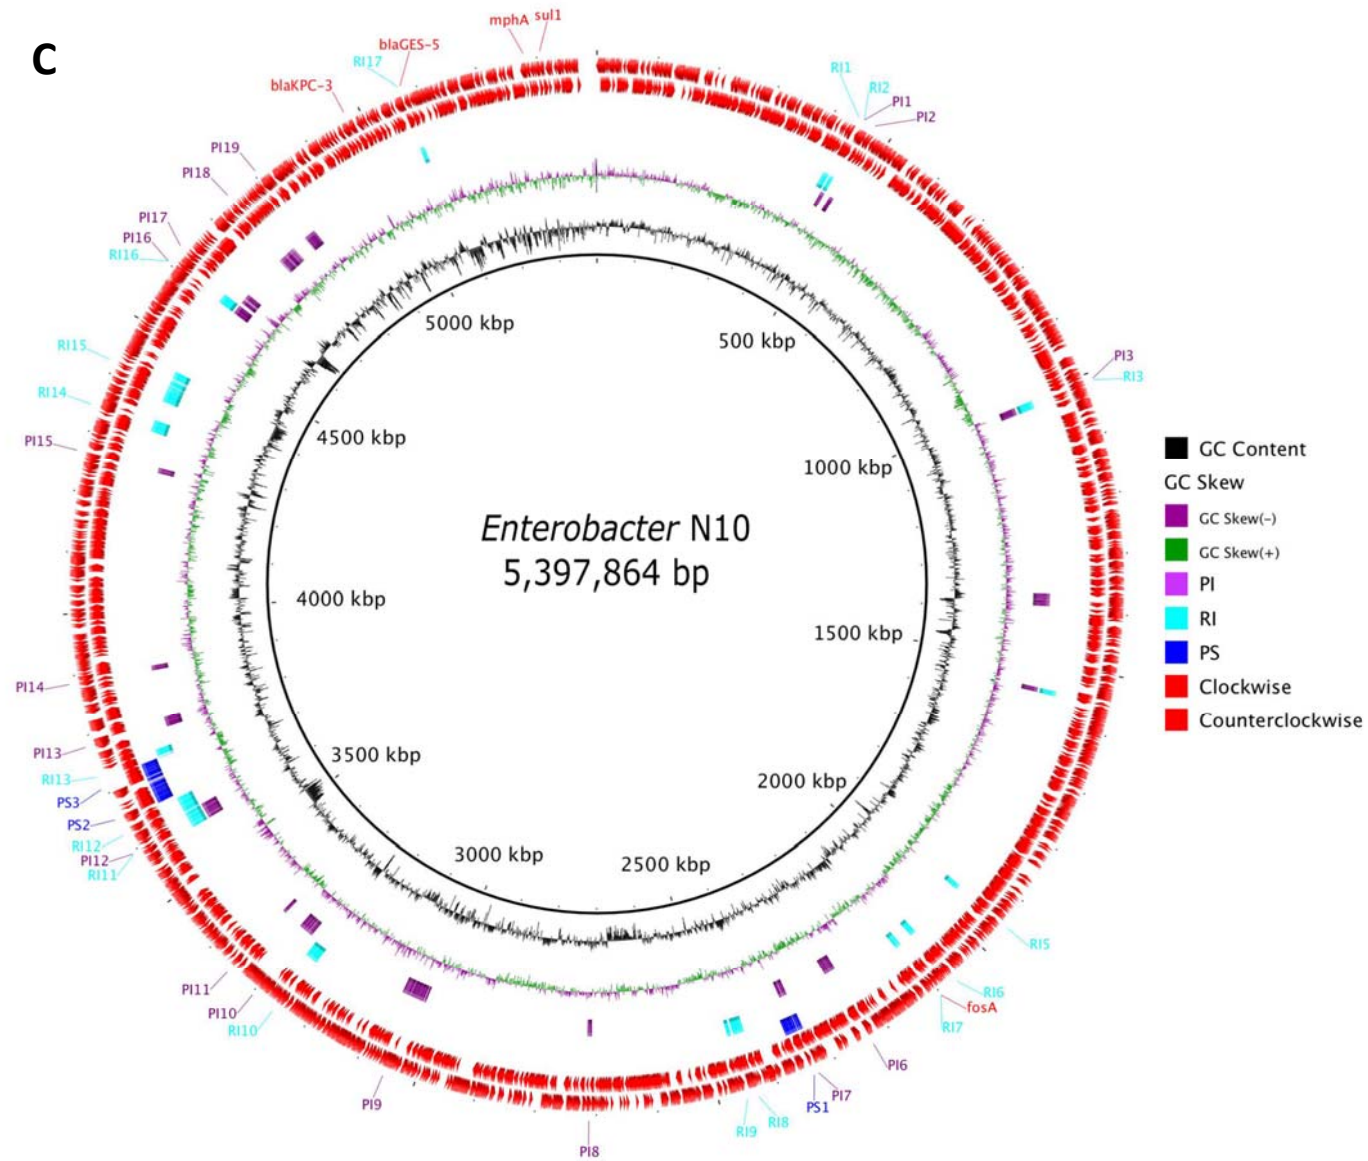

**Figure S4.** Circular genome representation of *C. freundii* F6 (A), *R. ornithinolytica* N9 (B) and *E. kobei* N10 (C). BRIG performed the alignment using a local BLAST+ with the standard parameters (50% lower-70% upper cut-off for identity and e-value of 10). The ring colour gradients correspond to varying degrees of identity of BLAST matches. Circular genomic maps include information on GC Skew, GC content, putative pathogenicity islands (PIs), putative resistance islands (RIs), prophage sequences (PS) and the location of ARGs and CRISPRs within the clockwise and counterclockwise CDS strands.

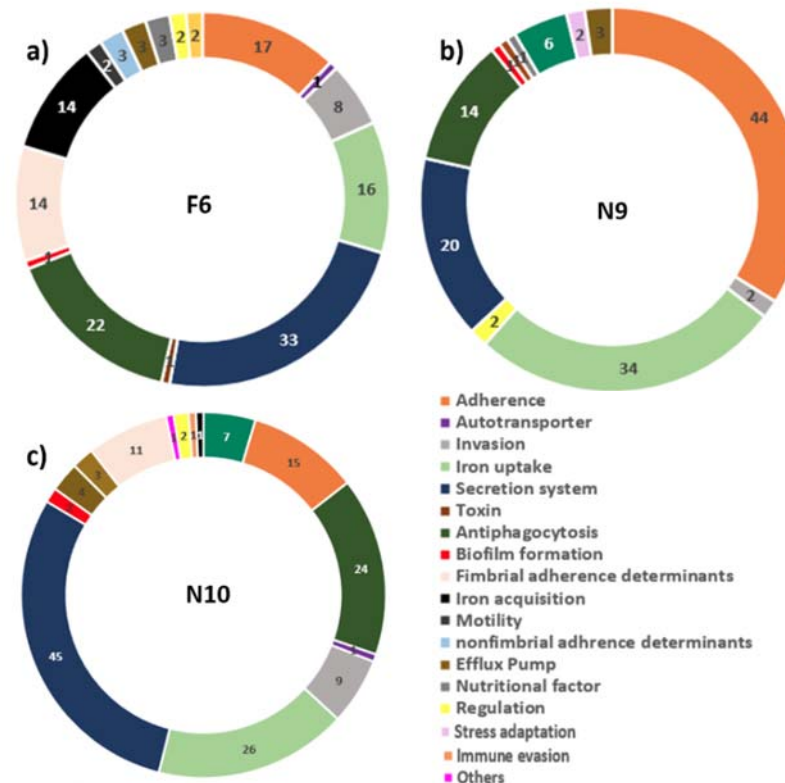

**Figure S5.** Category of bacterial virulence factors found in *C. freundii* F6 a), *R. ornithinolytica* N9 b) and *E. kobei* N10 c) according to the VFDB analysis.
